# Supplementary material
Source: publisher figshare collection journal article supplement (https://sage.figshare.com/ndownloader/files/15264266)
Supplement: Supplementary file [file 15264266]

## Appendices

**SUPPLEMENTARY TABLE A1. PRO RE NATA (PRN) MEDICATION USE OVER TIME**

|                      | CBT for<br>nightmares<br>(n=12) | Treatment as usual<br>(n=12) |
|----------------------|---------------------------------|------------------------------|
| PRN antipsychotics   |                                 |                              |
| Week 0               | 1 (8%)                          | 0                            |
| Week 4               | 1 (8%)                          | 1 (8%)                       |
| Week 8               | 1 (8%)                          | 1 (8%)                       |
| PRN mood stabilisers |                                 |                              |
| Week 0               | 0 (0%)                          | 0 (0%)                       |
| Week 4               | 0 (0%)                          | 0 (0%)                       |
| Week 8               | 0 (0%)                          | 0 (0%)                       |
| PRN anxiolytics      |                                 |                              |
| Week 0               | 2 (17%)                         | 0 (0%)                       |
| Week 4               | 2 (17%)                         | 1 (8%)                       |
| Week 8               | 2 (17%)                         | 2 (17%)                      |
| PRN anti-depressants |                                 |                              |
| Week 0               | 0 (0%)                          | 0                            |
| Week 4               | 0 (0%)                          | 1 (8%)                       |
| Week 8               | 0 (0%)                          | 1 (8%)                       |
| PRN hypnotics        |                                 |                              |
| Week 0               | 0 (0%)                          | 0 (0%)                       |
| Week 4               | 0 (0%)                          | 0 (0%)                       |
| Week 8               | 0 (0%)                          | 1 (8%)                       |

Data are n (%).

**SUPPLEMENTARY TABLE A2. NIGHTMARE LOG SCORES OVER TIME**

|                                            | CBT for<br>nightmares | n  | Treatment as<br>usual | n  | Adjusted<br>mean<br>difference<br>(95% CI) | Effect size<br>(d) |
|--------------------------------------------|-----------------------|----|-----------------------|----|--------------------------------------------|--------------------|
| Nightmare log total frequency              |                       |    |                       |    |                                            |                    |
| Week 0                                     | 7.4 (5.8)             | 11 | 9.9 (7.9)             | 12 |                                            |                    |
| Week 4                                     | 4.4 (4.8)             | 9  | 8.9 (10.7)            | 8  | -2.6 (-5.8; 0.6)                           | -0.4               |
| Week 8                                     | 3.7 (3.4)             | 10 | 12.5 (9.4)            | 6  | -4.8 (-8.3; -1.3)                          | -0.7               |
| Nightmare log average distress             |                       |    |                       |    |                                            |                    |
| Week 0                                     | 6.6 (2.4)             | 11 | 6.4 (1.8)             | 12 |                                            |                    |
| Week 4                                     | 3.9 (2.9)             | 9  | 6.3 (1.7)             | 9  | -2.2 (-4.5; 0.3)                           | -1.0               |
| Week 8                                     | 4.4 (2.9)             | 10 | 5.9 (1.5)             | 6  | -1.6 (-4.1; 0.9)                           | -0.8               |
| Nightmare log – total number of awakenings |                       |    |                       |    |                                            |                    |
| Week 0                                     | 6.6 (6.1)             | 11 | 7.4 (6.6)             | 12 |                                            |                    |
| Week 4                                     | 3.6 (4.9)             | 8  | 7.8 (8.6)             | 9  | -3.7 (-7.4; 0.1)                           | -0.6               |
| Week 8                                     | 1.9 (1.7)             | 9  | 9.5 (6.7)             | 6  | -3.8 (-8.0; 0.3)                           | -0.6               |
| Nightmare log – average sleep quality      |                       |    |                       |    |                                            |                    |
| Week 0                                     | 1.7 (0.9)             | 11 | 1.7 (0.7)             | 12 |                                            |                    |
| Week 4                                     | 2.2 (0.9)             | 9  | 1.8 (1.1)             | 9  | 0.4 (-0.4; 1.2)                            | 0.5                |
| Week 8                                     | 2.1 (0.9)             | 10 | 1.4 (0.6)             | 6  | 0.6 (-0.3; 1.4)                            | 0.7                |

Data are mean (SD). CI=confidence interval.

**SUPPLEMENTARY TABLE A3. DICHOTOMOUS ASSESSMENT OF SUICIDAL IDEATION ACROSS THE TRIAL PERIOD**

|                                        | Suicidal ideation outcome at week 4 (n=22) |                        |                       |                        | Suicidal ideation outcome at week 8 (n=20) |                        |                       |                        |
|----------------------------------------|--------------------------------------------|------------------------|-----------------------|------------------------|--------------------------------------------|------------------------|-----------------------|------------------------|
|                                        | No suicidal ideation                       |                        | Suicidal ideation     |                        | No suicidal ideation                       |                        | Suicidal ideation     |                        |
|                                        | CBT for<br>nightmares                      | Treatmen<br>t as usual | CBT for<br>nightmares | Treatmen<br>t as usual | CBT for<br>nightmares                      | Treatmen<br>t as usual | CBT for<br>nightmares | Treatmen<br>t as usual |
| No suicidal<br>ideation at<br>baseline | 6 (27%)                                    | 3 (14%)                | 0 (0%)                | 0 (0%)                 | 6 (30%)                                    | 2 (10%)                | 0 (0%)                | 1 (5%)                 |
| Suicidal<br>ideation at<br>baseline    | 0 (0%)                                     | 2 (9%)                 | 6 (27%)               | 5 (23%)                | 0 (0%)                                     | 4 (20%)                | 5 (25%)               | 2 (10%)                |

Data are counts (%). No suicidal ideation indicated by BSS score of 0. Suicidal ideation indicated by BSS >0.
